# Supplementary material for: Alkaline Dilution Alters Sperm Motility in Dairy Goat by Affecting sAC/cAMP/PKA Pathway Activity
Source: Int J Mol Sci. 2023 Jan 16;24(2):1771. doi: 10.3390/ijms24021771 (PMC9863640; doi:10.3390/ijms24021771)
Supplement: Supplementary file 1 [file ijms-24-01771-s001.zip › Supplementary_Material 1.xlsx]

## Sheet: Sheet1
pHi		6.8UP			7.4UP
0		5.15	5.12	4.83	5.33	4.85	4.81
5		5.2	4.88	5.12	6.16	6.18	6.43
10		4.9	5.1	5.31	6.73	6.86	7.03
15		5.39	4.85	5.2	6.78	7.14	6.76
20		4.97	5.16	5.48	6.98	6.96	6.7
pHi		6.8DOWN			7.4DOWN
0		5.02	5.42	4.91	4.92	4.89	5.39
5		4.87	5.41	4.97	6.41	6.44	6.04
10		4.93	5.24	5.23	6.98	6.8	6.67
15		5.18	5.4	4.91	7.07	6.75	6.74
20		5	5.41	5.05	6.74	6.71	7.2
Total motility %		6.8UP			6.8DOWN			7.4UP			7.4DOWN
0		34.4	34.53	37.39	32.08	32.24	36.18	37.52	34.12	34.86	33.72	34.07	36.56
5		37.56	31.5	37.43	37.08	33.63	35.78	41.9	40.87	38.73	35.18	34.11	38.54
10		38.27	38.22	32.87	33.5	37.64	35.5	46.39	42.34	46.65	40.56	40.91	37.03
15		40.72	36.16	35.48	36.77	37.78	34.81	46.82	46.25	52.44	42.22	43.02	39.25
20		38.38	40.3	36.83	35.44	38.94	37.98	52.85	53.86	56.8	40.64	43.88	45.23
25		38.36	42.97	37.17	39	42.03	36.94	59.4	64.05	58.17	48.4	42.44	42.67
30		41.4	42.43	37.68	37.23	41.38	40.03	68.1	61.92	63.49	44.52	48.5	47.41
35		44.46	38.96	41.22	40.61	42.85	40.12	69.86	74.29	73.35	47.81	51.14	49.54
40		44.06	39.04	44.26	43.35	38.5	42.65	80.26	79.93	75.31	52.55	50.58	46.7
Total motility %		6.8UP			6.8DOWN			7.4UP			7.4DOWN
0		17.24	20.5	20.76	22.52	17.83	20	20.41	24.75	20.65	19.91	23.32	19.26
5		22.83	25.47	19.2	19.7	22.59	23.41	31.05	25.61	25.84	24.56	28.11	21.98
10		23.17	23.01	27.32	22.22	22.21	27.68	29.58	34.8	35.98	25.86	28.62	26.02
15		23.36	29.85	26.3	24.32	27.53	27.79	36.35	42.22	36.94	26.89	31.88	26.59
20		30.55	27.35	29.92	27.29	30.89	27.18	42.81	43.46	47.24	30.04	30.59	34.92
25		34.45	31.2	28.84	27.64	33.36	30.5	53.08	49.24	49.19	35.87	36.89	32.99
30		34.11	35.31	31.07	29.66	33.79	30.91	54.62	56	58.88	35.27	36.57	40.66
35		33.16	36.25	36.95	32.9	35.7	31.76	62.93	60.53	57.9	42.35	39.55	42.45
40		38.03	40.42	34.04	37.23	39.06	33.21	66.44	69.6	64.05	46.98	43.49	43.04
Xsperm percentage %		6.8DOWN			7.4DOWN
0		47.51	51.96	48.28	45.36	50.6	51.49
5		47.95	49.08	52.52	51.2	52.17	57.13
10		47.73	47.51	53.26	55.98	58.44	60.62
15		48.95	49.06	52.61	61.96	58.18	61.36
20		51.05	52.77	47.83	59.77	65.69	61.31
25		47.89	52.73	51.33	64	66.47	61.48
30		48.27	51.71	51.97	66.71	63.11	67.05
35		53.4	48.2	49.76	70.57	70.1	64.83
40		49.41	54.18	48.06	67.43	72.03	72.04
45		48.39	53.74	49.22	66.32	66.91	70.93

## Sheet: Sheet2
Calcium (mM)		6.8UP			6.8DOWN			7.4UP			7.4DOWN
0		0.98	1.12	1.16	1.29	0.83	1.17	1.35	0.89	1.01	0.96	0.7	1.47
10		1.26	1.09	1.43	1.22	1.17	1.37	1.47	1.67	1.62	1.11	1.39	1.41
20		1.39	1.38	1.19	1.43	1.17	1.32	2.05	2.16	1.9	1.57	2.19	1.41
30		1.47	1.5	1.16	1.18	1.53	1.36	2.39	2.57	2.74	1.94	2.46	1.64
40		1.48	1.26	1.14	1.36	1.19	1.6	3.25	2.84	3.07	2.12	2.2	2.56
Concentration of NNC （μM）	0			0.25			0.5			0.75			1			1.25
pH 7.4 DOWN Calcium (mM)	1.38	1.38	1.19	1.29	1.4	1.17	0.99	1.24	1.29	1.23	1.02	1.09	0.93	1.1	1.17	0.91	1.05	1.2
Forward progressive motility %	38.06	35.48	39.92	34.55	35.73	39.08	28.18	31.88	28.43	25.32	29.59	27.73	24.38	27.92	24.05	25.68	26.01	21.95
Concentration of NNC （μM）	0			0.25			0.5			0.75			1			1.25
pH 7.4 DOWN X-sperm %	56.46	64.98	60.07	60	64.8	56.7	54.84	50.85	54.8	52.11	48.38	54.75	52.56	48.75	49.14	47.9	48.3	52.16

## Sheet: Sheet3
time		pH 6.8			pH 7.4 UP			pH 7.4 DOWN
0		0.27	0.33	0.3	0.5	0.5	0.53	0.44	0.52	0.44
10		0.35	0.28	0.31	0.77	0.86	0.85	0.56	0.58	0.65
20		0.31	0.36	0.33	1.22	1.19	1.19	0.75	0.75	0.74
30		0.33	0.36	0.35	1.5	1.53	1.5	0.84	0.9	0.9
40		0.34	0.36	0.39	1.61	1.57	1.64	1.01	1.07	1.06
time		pH 7.4 UP (pHi)			sAC activity (pmoles/min/ 106 sperm)
0		4.91	5.75	4.63	0.38	0.39	0.74
10		6.47	6.99	7.14	0.58	0.98	0.99
20		7.09	6.37	7.23	1.31	0.95	1.49
30		6.35	7.08	7.34	1.74	1.22	1.4
40		6.64	6.63	7.59	1.78	1.42	1.45
time		pH 7.4 DOWN (pHi)			sAC activity (pmoles/min/ 106 sperm)
0		5.07	4.49	5.66	0.54	0.59	0.29
10		7.53	6.49	6.43	0.53	0.54	0.74
20		7.39	6.37	6.89	0.95	0.67	0.64
30		6.57	7.53	6.71	0.65	1.14	0.9
40		6.79	6.64	7.53	0.99	1.23	0.92
time		pH 7.4 UP Calcium (mM)			sAC activity (pmoles/min/ 106 sperm)
0		0.83	1.1	1.3	0.62	0.5	0.24
10		1.31	1.58	1.89	0.66	0.92	0.67
20		2.21	1.77	2.13	1.22	1.04	1.38
30		2.88	2.2	2.62	1.29	1.41	1.66
40		3.38	2.87	2.89	1.4	1.6	1.65
time		pH 7.4 DOWN Calcium (mM)			sAC activity (pmoles/min/ 106 sperm)
0		0.6	1.33	1.21	0.52	0.47	0.43
10		1.48	0.88	1.55	0.64	0.55	0.62
20		1.72	1.31	2.14	0.76	0.75	0.74
30		2.01	2.42	1.59	0.96	0.93	0.89
40		2.7	1.87	2.29	1.07	1.01	1.06

## Sheet: Sheet4
time		sAC activity (pmoles/min/ 106 sperm)			pH 7.4 UP cAMP (in pmole/107 sperm)					intden pPkas
0		0.775	0.431	0.444	3.054	4.396	4.399			pH 6.8	2.15	2	2.13
10		1.006	0.727	0.773	4.639	6.265	4.846			pH7.4UP	2.8	2.96	2.73
20		0.956	1.222	1.272	5.756	6.918	5.776			pH7.4DOWN	2.56	2.62	2.43
30		1.28	1.5	1.667	7.833	6.495	7.423			intden pY
40		1.49	1.734	1.66	8.802	7.81	8.738			pH 6.8	0.65	0.68	.0.63
										pH7.4UP	0.85	0.89	0.84
										pH7.4DOWN	0.74	0.71	0.73
time		sAC activity (pmoles/min/ 106 sperm)			pH 7.4 DOWN cAMP (in pmole/107 sperm)
0		0.347	0.378	0.699	3.165	4.272	2.778
10		0.503	0.776	0.536	2.749	4.538	3.678
20		0.665	0.635	0.935	3.185	4.398	4.266
30		1.094	0.797	0.753	4.753	3.525	4.667
40		0.979	0.975	1.21	4.662	4.869	3.82
time		sAC activity (pmoles/min/ 106 sperm)			pH 7.4 UP PKA (in pmole/107 sperm)
0		0.344	0.675	0.332	1.791	3.358	2.5
10		0.593	0.891	0.766	2.448	4.129	3.773
20		0.997	1.326	1.13	4.859	4.028	5.363
30		1.328	1.673	1.648	6.413	5.809	5.027
40		1.789	1.521	1.63	6.997	7.139	6.114
time		sAC activity (pmoles/min/ 106 sperm)			pH 7.4 DOWN PKA (in pmole/107 sperm)
0		0.366	0.34	0.69	2.17	2.037	3.442
10		0.557	0.522	0.797	3.874	2.216	2.461
20		0.562	0.814	0.873	3.386	4.291	2.972
30		0.806	0.702	1.076	3.358	4.303	4.69
40		0.972	1.19	0.973	3.713	0.603	4.734
time		sAC activity (pmoles/min/ 106 sperm)			pH 7.4 UP forward motility %
0		0.432	0.443	0.775	50.986	52.219	48.216
10		0.607	0.905	0.738	54.823	52.634	57.526
20		1.418	1.088	1.244	58.647	64.021	58.833
30		1.526	1.704	1.462	63.273	69.475	63.752
40		1.676	1.644	1.445	66.564	70.606	71.556
time		sAC activity (pmoles/min/ 106 sperm)			pH 7.4 DOWN forward motility %
0		0.25	0.595	0.579	22.441	27.127	26.931
10		0.516	0.535	0.784	25.481	27.438	29.58
20		0.642	0.945	0.678	29.998	31.928	25.225
30		0.74	1.017	1.092	32.874	32.211	27.465
40		0.875	1.016	1.125	30.996	29.941	34.614
time		sAC activity (pmoles/min/ 106 sperm)			pH 7.4 UP X sperm %
0		0.358	0.319	0.674	50.85	47.662	53.137
10		0.989	0.692	0.809	43.806	49.596	42.048
20		1.448	1.183	1.119	43.257	41.396	35.498
30		1.412	1.736	1.417	35.416	30.08	37.064
40		1.688	1.467	1.682	27.877	27.051	33.572
time		sAC activity (pmoles/min/ 106 sperm)			pH 7.4 DOWN X sperm %
0		0.699	0.376	0.349	52.79	46.295	52.43
10		0.7	0.401	0.55	52.058	55.032	61.359
20		0.556	0.819	0.861	57.175	66.144	58.031
30		0.832	0.767	1.116	65.1	61.076	68.975
40		0.996	0.969	1.199	65.646	68.943	73.761

## Sheet: Sheet5
cAMP content											time		pH 7.4 UP cAMP (in pmole/107 sperm)			PKA (in pmole/107 sperm)												camp inhibitor				pPKAs	pH7.4 UP		1.35	1.32	1.38
											0		0.443	0.467	0.545	2.629	2.282	2.44															pH7.4 DOWN		1.01	1	1.04
No inhibitors	time										10		0.515	0.564	0.437	2.52	2.4	2.776														Py	pH7.4 UP		0.51	0.53	0.51
pH 7.4 UP	0	3.23	3.6	4.73							20		0.543	0.465	0.567	2.477	2.754	2.673															pH7.4 DOWN		0.402	0.429	0.381
	10	6.16	4.47	4.83							30		0.453	0.602	0.52	2.554	2.921	2.61
	20	6.81	5.47	6.16							40		0.593	0.465	0.546	2.525	2.818	2.893
	30	7.74	6.55	7.75
	40	8.73	8.81	7.81
pH 7.4 DOWN	0	3.98	2.53	3.77
	10	4.61	3.51	2.84							time		pH 7.4 DOWN cAMP (in pmole/107 sperm)			PKA (in pmole/107 sperm)
	20	3.9	3.16	4.5							0		0.269	0.166	0.259	2.169	2.289	2.383
	30	4.81	3.52	4.59							10		0.134	0.221	0.245	2.452	2.701	2.694
	40	5.01	3.92	4.71							20		0.267	0.192	0.185	2.709	2.755	2.902
											30		0.172	0.283	0.22	3.191	2.81	2.962
Addition of inhibitors											40		0.239	0.164	0.272	3.249	2.976	3.239
pH 7.4 UP	0	0.46	0.53	0.44
	10	0.47	0.54	0.53
	20	0.53	0.47	0.55
	30	0.52	0.55	0.5
	40	0.51	0.59	0.5							time		pH 7.4 UP cAMP (in pmole/107 sperm)			Forward motility %
pH 7.4 DOWN	0	0.2	0.2	0.28							0		0.448	0.555	0.49	51.159	50	47.537
	10	0.23	0.17	0.22							10		0.546	0.538	0.432	49.463	52.852	52.335
	20	0.25	0.2	0.19							20		0.525	0.472	0.578	53	50.872	56.627
	30	0.18	0.23	0.24							30		0.477	0.611	0.487	55.884	56.351	51.414
	40	0.22	0.2	0.23							40		0.545	0.475	0.584	54.783	54.094	58.072
PKA protease activity											time		pH 7.4 DOWN cAMP (in pmole/107 sperm)			Forward motility %
No inhibitors											0		0.268	0.176	0.28	27.222	24.251	25
pH 7.4 UP	0	1.79	3.34	2.5							10		0.31	0.2	0.195	24.864	29.422	25.065
	10	2.89	4.45	2.92							20		0.162	0.243	0.239	25.923	30.899	25.915
	20	5.51	4.26	4.48							30		0.167	0.276	0.202	31.627	27.176	30.446
	30	6.45	5.32	5.19							40		0.257	0.267	0.151	33.171	30.007	30.272
	40	7.06	6.01	7.09
pH 7.4 DOWN	0	2.22	3.19	2.23
	10	3.11	2.21	3.24
	20	2.87	3.76	4.01
	30	4	3.46	4.68							time		pH 7.4 UP cAMP (in pmole/107 sperm)			pH 7.4 UP X sperm %
	40	3.83	4.94	4.4							0		0.489	0.555	0.595	48.112	50.895	52.795
											10		0.502	0.571	0.443	51.987	48.584	48.079
											20		0.51	0.481	0.584	49.535	45.745	50.369
											30		0.546	0.57	0.429	49.578	46.552	46.82
											40		0.489	0.498	0.589	47.618	44.526	48.406
Addition of inhibitors	0	2.5	3.09	2.03
	10	2.92	3.14	2.19
	20	3.3	3.47	2.49
	30	2.85	3.66	3.62							time		pH 7.4 DOWN cAMP (in pmole/107 sperm)			pH 7.4 DOWN X sperm %
	40	3.91	3.35	3.8							0		0.14	0.246	0.229	49.5	51.899	47.25
	0	2.13	2.92	2.17							10		0.223	0.231	0.132	52.343	52.658	49.35
	10	2.33	3.01	2.45							20		0.228	0.155	0.261	54.939	49.454	53.857
	20	2.29	2.95	3.09							30		0.29	0.166	0.215	53.233	52.36	56.256
	30	2.99	3.52	2.47							40		0.161	0.257	0.257	55.792	57.117	52.541
	40	3.36	2.71	3.49
											time		pH 7.4 UP PKA (in pmole/107 sperm)			pH 7.4 UP forward motility %
											0		2.28	3.168	2.201	49.993	51.019	46.738
											10		2.202	2.772	3.276	50.086	53.443	50.52
											20		3.681	2.492	3.082	53.004	54.934	50.613
											30		3.051	3.166	3.908	57.469	52.231	54.55
											40		3.339	3.848	3.897	59.069	53.481	56.2
											time		pH 7.4 DOWN PKA (in pmole/107 sperm)			pH 7.4 DOWN forward motility %
											0		2.431	2.839	1.946	48.9	50.824	47.126
											10		2.407	2.361	3.017	51.283	50.823	47.044
											20		2.428	3.266	2.661	51.893	52.315	47.293
											30		2.99	3.522	2.472	51.046	50.707	54.997
											40		2.546	3.575	3.435	56.206	51.764	51.479
											time		pH 7.4 UP PKA (in pmole/107 sperm)			pH 7.4 UP X sperm %
											0		2.082	2.203	3.066	50.031	50.257	54.211
											10		3.101	3.017	2.132	49.5	51.724	47.425
											20		3.666	3.112	2.478	46.923	51.368	47.358
											30		3.073	3.141	3.911	48.713	45.631	48.606
											40		3.848	3.879	3.329	48.636	47.223	44.414
											time		pH 7.4 DOWN PKA (in pmole/107 sperm)			pH 7.4 DOWN X sperm %
											0		2.786	1.919	2.539	49.991	47.036	51.623
											10		2.6	2.974	2.241	51.5	53.259	49.592
											20		2.445	3.271	2.639	53.37	55.3	49.58
											30		2.379	3.298	3.279	53.636	52.08	56.133
											40		2.632	3.204	3.748	54.048	57.963	53.739

## Sheet: Sheet6
cAMP (in pmole/107 sperm)			PH7.4UP			PH7.4DOWN						camp inhibitor				pPKAs	pH7.4 UP		1.05	1.07	1.06
		CONTROL	7.82	8.63	8.9	4.5	4.25	5.17									pH7.4 DOWN		0.68	0.65	0.7
		cAMP inhibitor	0.58	0.53	0.47	0.18	0.28	0.21								Py	pH7.4 UP		0.42	0.44	0.39
																	pH7.4 DOWN		0.32	0.31	0.33
PKA (in pmole/107 sperm)			PH7.4UP			PH7.4DOWN
		CONTROL	6.25	6.64	7.36	4.64	3.92	4.79
		cAMP inhibitor	2.61	2.97	2.68	2.6	2.46	2.77
Forward motility %			PH7.4UP			PH7.4DOWN
		CONTROL	68.21	67.64	72.65	31.9	29.52	34.42
		cAMP inhibitor	56.92	56.53	53.05	33.17	30.02	30.26
Xsperm percentage %			PH7.4UP			PH7.4DOWN
		CONTROL	34.37	27.13	30	73.78	65.98	68.59
		cAMP inhibitor	45.38	45.97	49.2	52.63	55.53	57.29
PKA (in pmole/107 sperm)			PH7.4UP			PH7.4DOWN
		CONTROL	7.21	6.91	6.13	3.93	4.23	4.89
		PKA inhibitor	4.02	3.41	3.63	3.83	2.79	2.96
Forward motility %			PH7.4UP			PH7.4DOWN
		CONTROL	71.96	66.54	70	29.41	32.12	34.31
		PKA inhibitor	59.06	53.49	56.2	28.67	29.66	24.64
Xsperm percentage %			PH7.4UP			PH7.4DOWN
		CONTROL	33.24	31.78	26.48	66.62	68.13	73.3
		PKA inhibitor	45.79	49.22	45.54	56.93	52.48	56.04

## Sheet: Sheet7
Sperm ratio (%)		PH6.8			PH7.4UP			PH7.4DOWN
	F	86.66	89.76	91.04	86.33	86.66	82.17	87.59	90.09	93.08
	B	8.14	7.06	7.45	11.04	9.06	10.71	6.48	7.77	7.2
	AR	2.8	3.66	2.99	3.26	4.1	4.48	3.69	2.01	3.46
